# Supplementary material for: Imbalance of human CD4+ T lymphocyte subsets following atrazine treatment
Source: Springer Nature journal article supplement (doi:10.1007/s00204-025-03974-9), 2025-03-02
Supplement: MOESM1 [file 204_2025_3974_MOESM1_ESM.pdf]

# **Imbalance of human CD4<sup>+</sup> T lymphocyte subsets following atrazine treatment**

Mahdieh Naghavi Alhosseini<sup>1</sup>, Ambra Maddalon<sup>2</sup>, Luigi Cari<sup>1#</sup>, Simona Ronchetti<sup>1</sup>, Graziella Migliorati<sup>1</sup>, Emanuela Corsini<sup>2</sup>, Giuseppe Nocentini<sup>1</sup>

<sup>1</sup>Department of Medicine and Surgery, Section of Pharmacology, Università degli Studi di Perugia, 06129, Perugia, Italy

<sup>2</sup>Laboratory of Toxicology, Department of Pharmacological and Biomolecular Sciences 'Rodolfo Paoletti', Università degli Studi di Milano, Via Balzaretti 9, 20133, Milan, Italy

## **Supplementary Information**

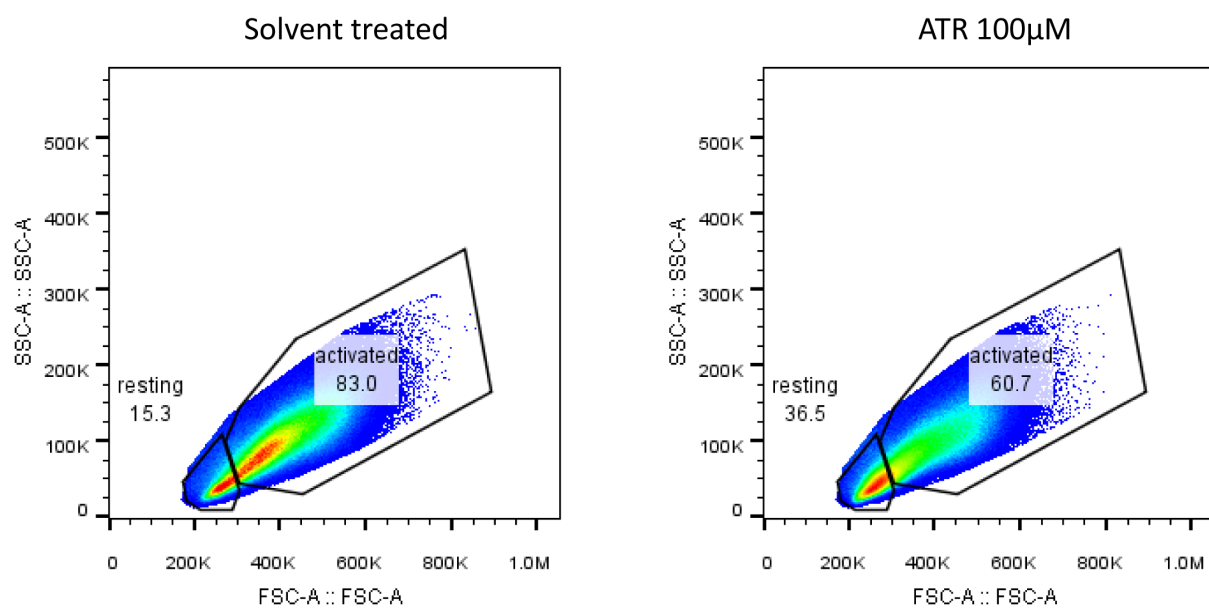

**Figure S1.** T cell population gated for activated and resting cells.

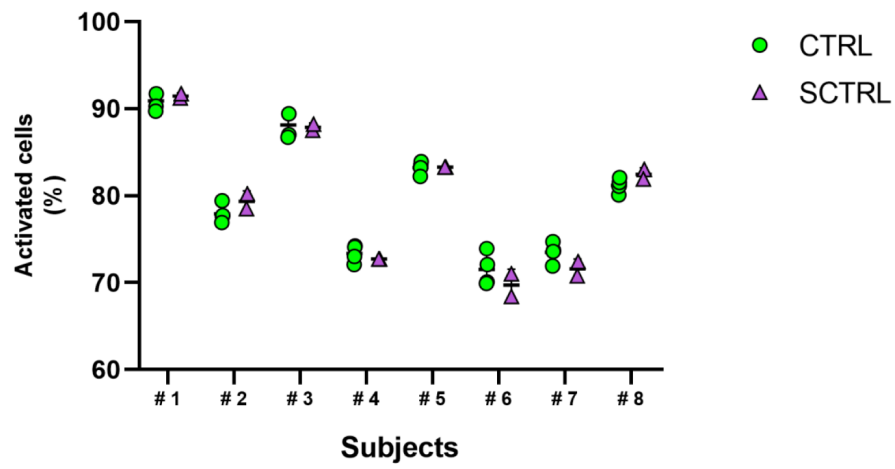

**Figure S2.** The percentage of activated cells in controls (CTRL) and solvent controls (SCTRL) of each subject. 2-way ANOVA test was used to assess statistical significance of the mean difference between CTRL and SCTRL in each subject. No differences were observed.

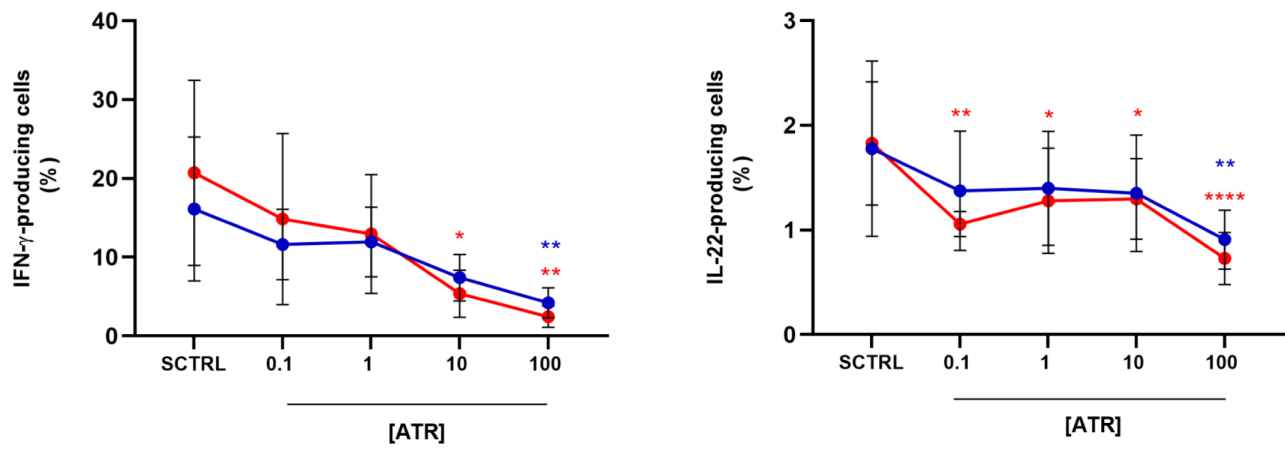

**Figure S3.** Modulation of IFN- $\gamma$ - and IL-22-producing cells in male and female subjects. Data from male subjects are shown in blue, and data from female subjects in red. The RM one-way ANOVA test (Friedman) were used to assess statistical significance.



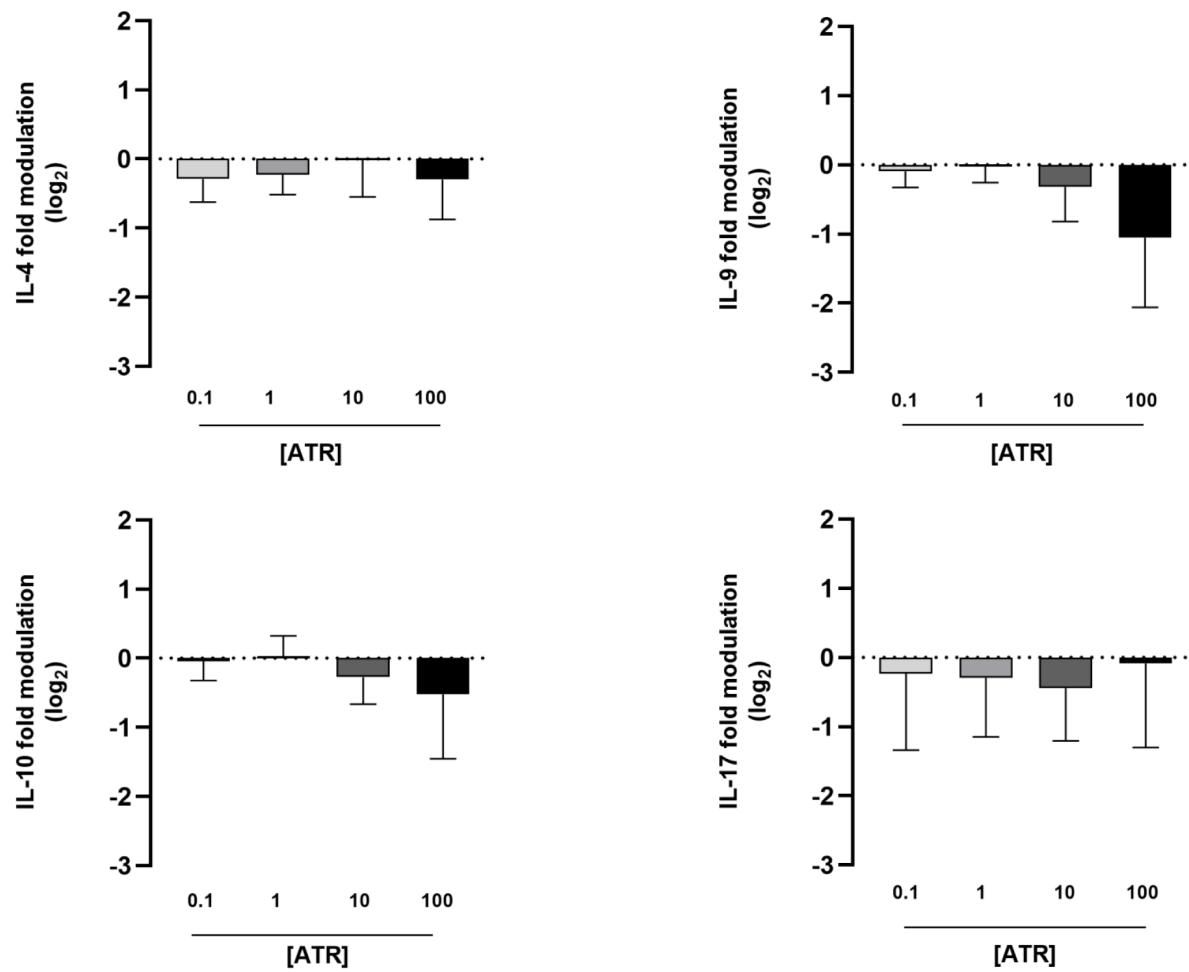

**Figure S4.** Modulation of cytokine-producing cells (IL-4, IL-9, IL-10, and IL17), following ATR treatment. The mean $\pm$ SD modulation of the percentage of cytokine producing cells, relative to SCTRL is shown. Kruskal-Wallis test was used to assess statistical significance.

**Males**

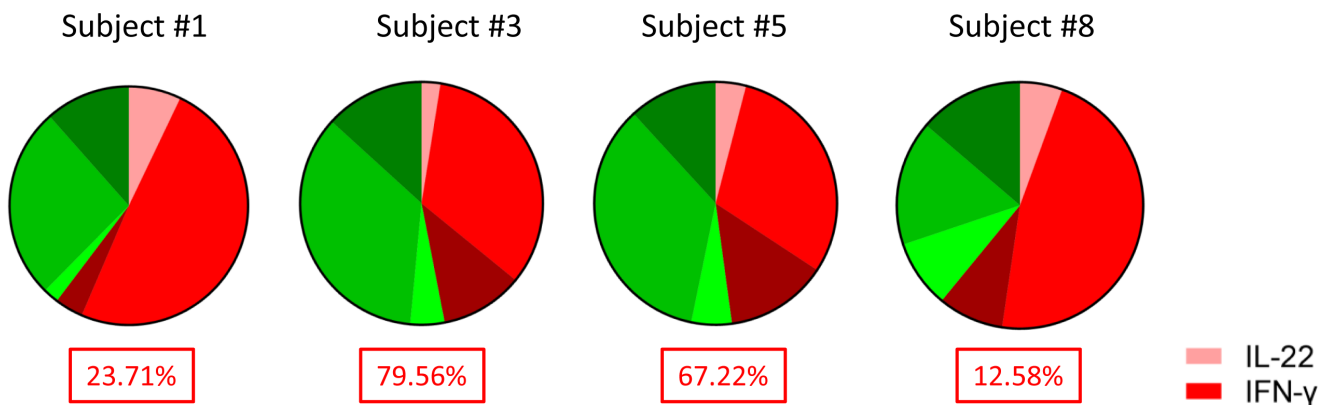

**Females**

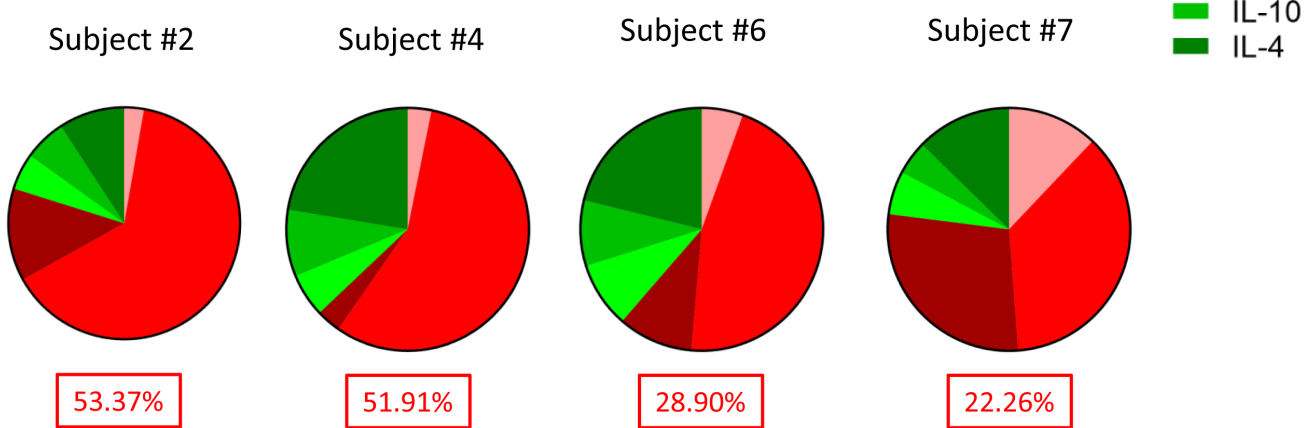

**Figure S5.** The pie charts show the percentage of cells producing the specified cytokines within the cytokine-producing cells in SCTRL samples from each subject. The percentage of cytokine-producing cells has been reported in the red box.

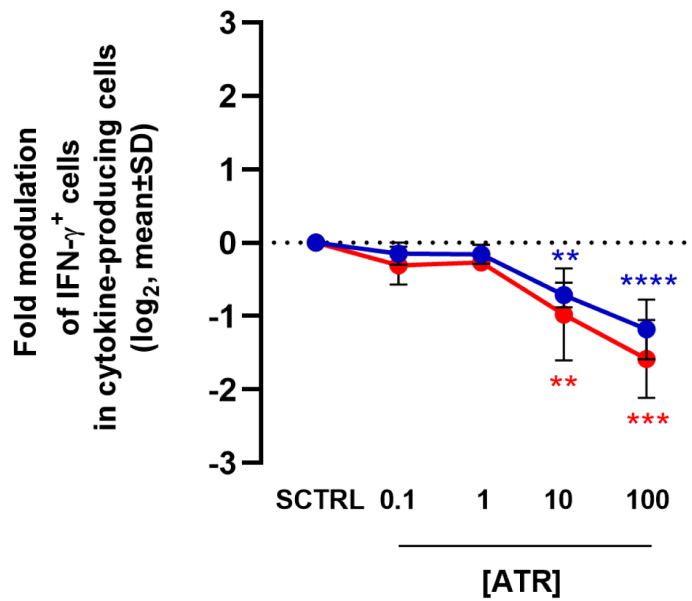

**Figure S6.** Modulation of IFN- $\gamma$ -producing cells following ATR treatment in male and female subjects. Data from male subjects are shown in blue, and data from female subjects in red. The RM one-way ANOVA was used to assess statistical significance.

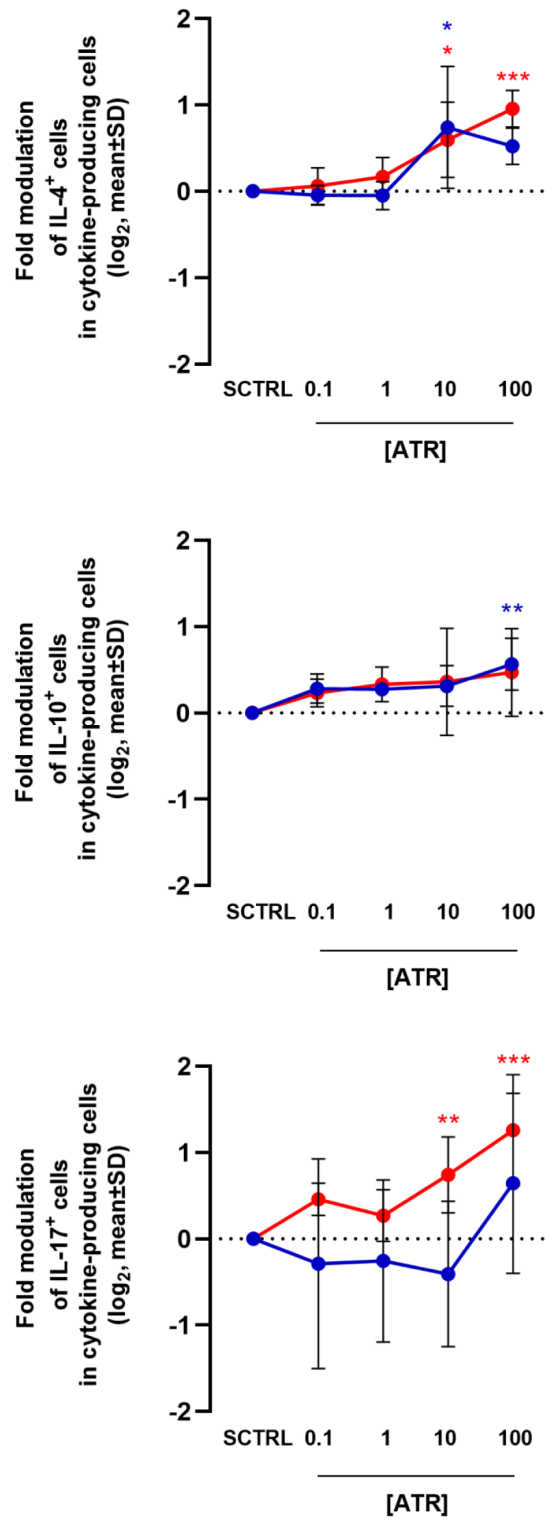

**Figure S7.** Modulation of IL-4-, IL-10- and IL-17-producing cells in male and female subjects. Data from male subjects are shown in blue, and data from female subjects in red. The RM one-way ANOVA was used to assess statistical significance.

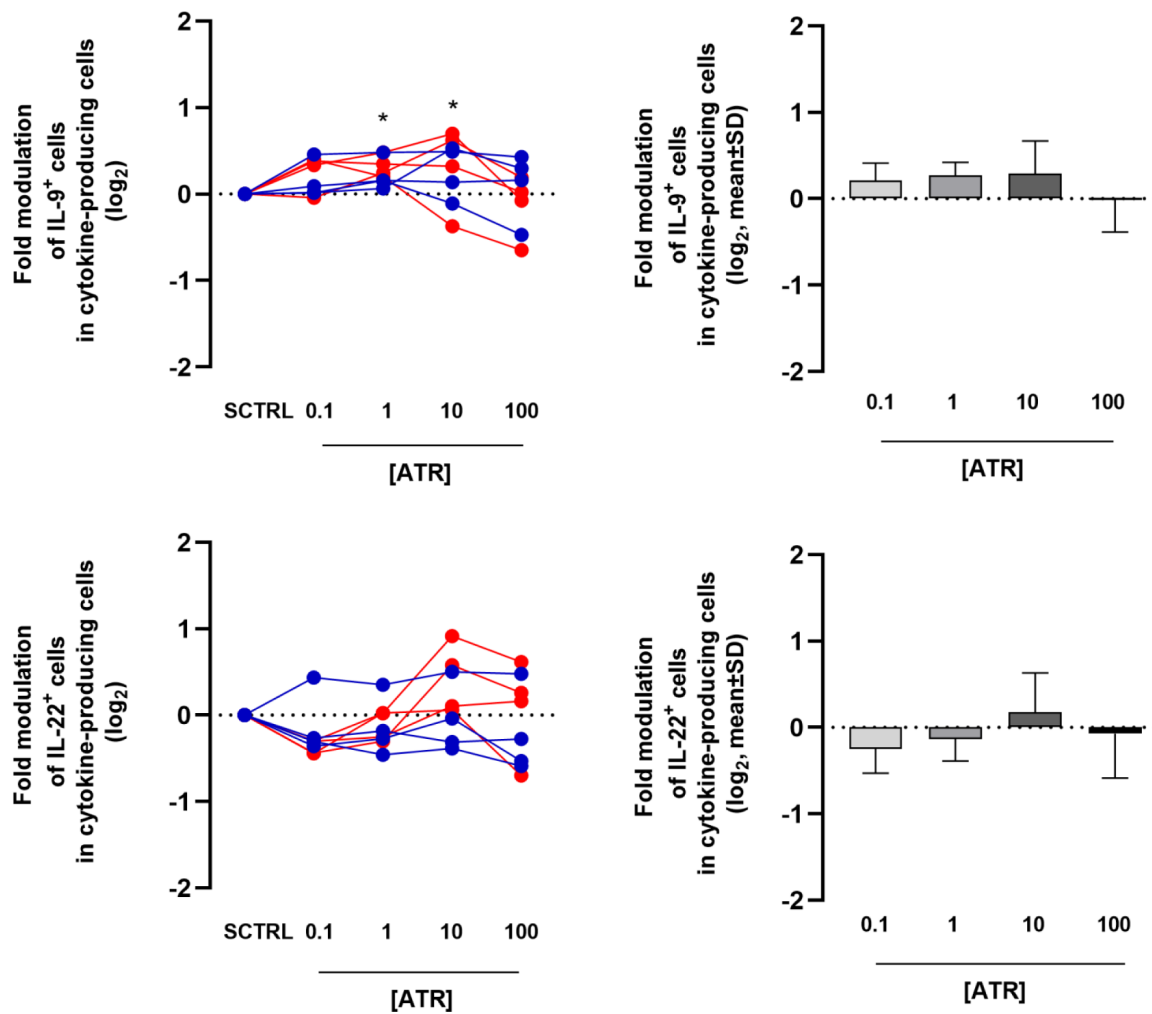

**Figure S8.** Modulation of IL-9- and IL-22-producing cells in male and female subjects (left panels). Data from male subjects are shown in blue, and data from female subjects in red. The mean $\pm$ SD modulation of the percentage of cytokine producing cells, relative to SCTRL is also shown (right panels). To assess statistical significance, the Friedman test was used for the dot graphs and the Kruskal-Wallis test was used for the column graphs.

## Males

Subject #1

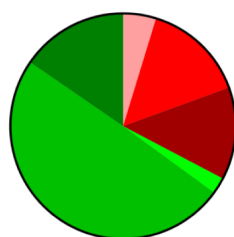

20.08%

Subject #3

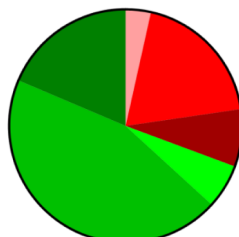

36.76%

Subject #5

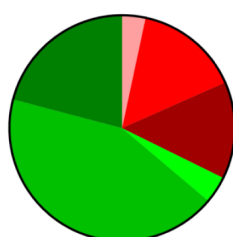

21.93%

Subject #8

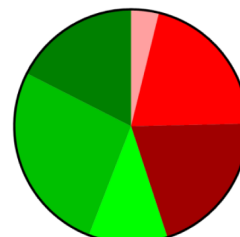

17.14%

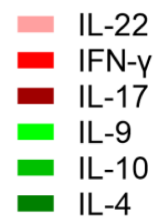

## Females

Subject #2

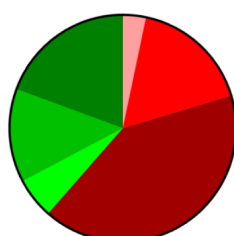

14.43%

Subject #4

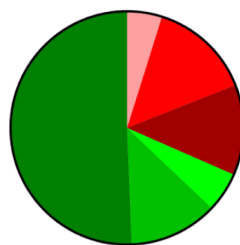

13.55%

Subject #6

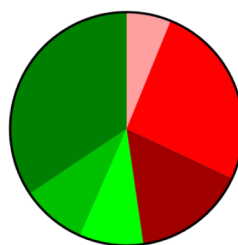

16.09%

Subject #7

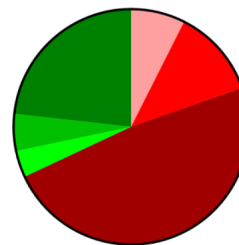

10.21%

**Figure S9.** The pie charts show the percentage of cells producing the specified cytokines within the cytokine-producing cells in 100 microM ATR-treated samples from each subject. The percentage of cytokine-producing cells has been reported in the red box.

## Males

## Females

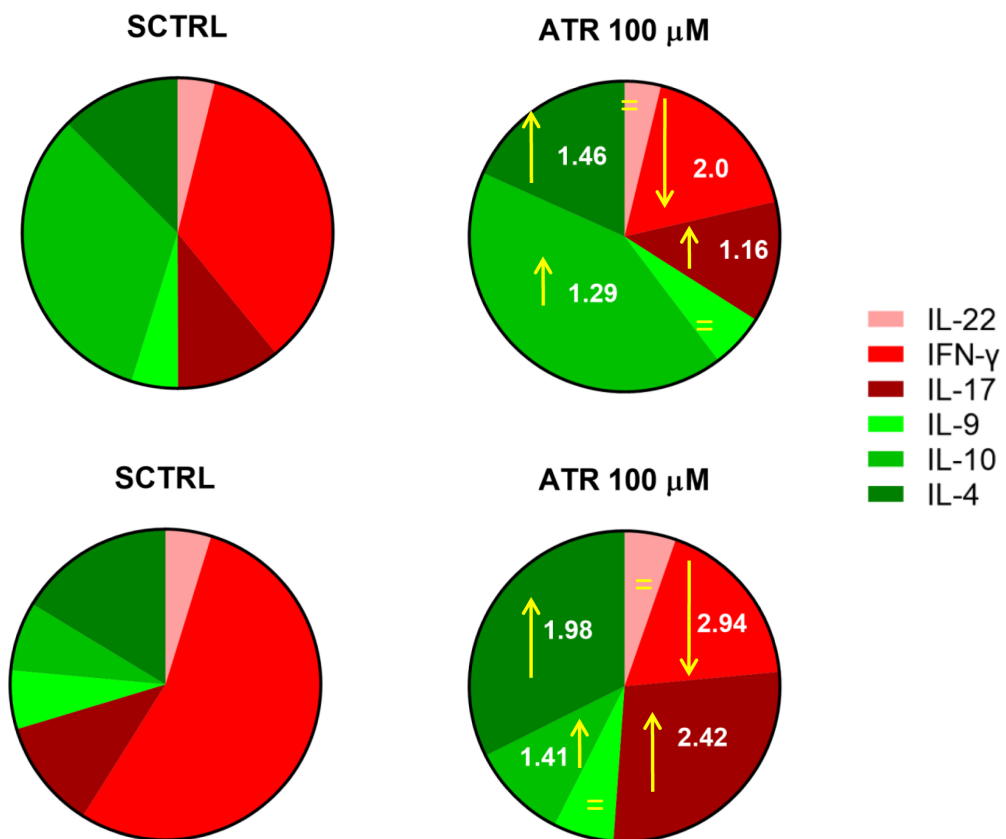

**Figure S10.** The pie charts illustrate the mean modulation of cytokines within the whole cytokine-producing cells in SCTRL and samples treated with 100  $\mu$ M ATR in males and females. The arrows pointing upward represents the increase and the ones downwards represents the decrease in modulation. The relative intensity of modulation was shown by shorter or longer size of arrows.

**Table S1.** Age and sex of donors

| Age (years) | Donors | Males/Females |
|-------------|--------|---------------|
| 18-24       | 1      | 0/1           |
| 25-49       | 6      | 3/3           |
| 50-69       | 1      | 1/0           |



**Table S2.** Clones and suppliers of antibodies used in the manuscript

| Target        | Clone       | Supplier                 |
|---------------|-------------|--------------------------|
| CD4           | OKT4        | Thermo Fisher Scientific |
| CD8           | PRA-TB      | Thermo Fisher Scientific |
| CD25          | BC96        | Thermo Fisher Scientific |
| GITR          | DT5D3       | Miltenyi Biotec          |
| FoxP3         | 236°/E7     | Thermo Fisher Scientific |
| IFN- $\gamma$ | 4S.B3       | Thermo Fisher Scientific |
| IL-4          | BD4-8       | Thermo Fisher Scientific |
| IL-9          | MH9D1       | Thermo Fisher Scientific |
| IL-10         | JES3-9D7    | Thermo Fisher Scientific |
| IL-17         | Ebio64DEC17 | Thermo Fisher Scientific |
| IL-22         | IL22JOP     | Thermo Fisher Scientific |

**Table S3.** The percentage of cytokine-producing cells in samples from each donor

| <b>Donors</b> | <b>sex</b> | <b>SCTRL</b> | <b>0.1 <math>\mu</math>M</b> | <b>1 <math>\mu</math>M</b> | <b>10 <math>\mu</math>M</b> | <b>100 <math>\mu</math>M</b> |
|---------------|------------|--------------|------------------------------|----------------------------|-----------------------------|------------------------------|
| <b>#1</b>     | M          | 23.71        | 25.84                        | 23.6                       | 22.16                       | 20.08                        |
| <b>#3</b>     | M          | 79.56        | 57.59                        | 61.65                      | 53.57                       | 36.76                        |
| <b>#5</b>     | M          | 67.22        | 43.78                        | 46.87                      | 50.88                       | 21.93                        |
| <b>#8</b>     | M          | 12.58        | 13.48                        | 15.73                      | 11.72                       | 17.14                        |
| <b>#2</b>     | F          | 53.37        | 47.98                        | 40.43                      | 19.37                       | 14.43                        |
| <b>#4</b>     | F          | 51.91        | 40.5                         | 37.81                      | 21.36                       | 13.55                        |
| <b>#6</b>     | F          | 28.9         | 22.35                        | 21.37                      | 22.79                       | 16.09                        |
| <b>#7</b>     | F          | 22.26        | 13.52                        | 16.13                      | 13.41                       | 10.21                        |

**Table S4.** Modulation of the percentage of cytokine-producing cells in ATR-treated samples as compared to the respective solvent-treated controls, expressed as percentage (positive value = increase, negative value = decrease)

| Donors                             | Sex | 0.1 $\mu$ M | 1 $\mu$ M | 10 $\mu$ M | 100 $\mu$ M |
|------------------------------------|-----|-------------|-----------|------------|-------------|
| #1                                 | M   | 9%          | 0%        | -7%        | -15%        |
| #3                                 | M   | -28%        | -23%      | -33%       | -54%        |
| #5                                 | M   | -35%        | -30%      | -24%       | -67%        |
| #8                                 | M   | 7%          | 25%       | -7%        | 36%         |
| Mean*                              | M   | -12%        | -7%       | -18%       | -25%        |
|                                    |     |             |           |            |             |
| #2                                 | F   | -10%        | -24%      | -64%       | -73%        |
| #4                                 | F   | -22%        | -27%      | -59%       | -74%        |
| #6                                 | F   | -23%        | -26%      | -21%       | -44%        |
| #7                                 | F   | -39%        | -28%      | -40%       | -54%        |
| Mean**                             | F   | -24%        | -26%      | -46%       | -61%        |
|                                    |     |             |           |            |             |
| Mean M/F modulation difference (%) |     | 12%         | 19%       | 28%        | 36%         |

\* p-value = not significant

\*\*p-value = 0.0091 (0.1  $\mu$ M), 0.0140 (1  $\mu$ M), not significant (10  $\mu$ M), 0.0433 (100  $\mu$ M)

**Table S5.** The percentage of CD4<sup>+</sup> subpopulation in PBMC of donors after 4-days culture

|       |      |       | atrazine    |           |            |             |
|-------|------|-------|-------------|-----------|------------|-------------|
| Donor | CTRL | SCTRL | 0.1 $\mu$ M | 1 $\mu$ M | 10 $\mu$ M | 100 $\mu$ M |
| #1    | 50.1 | 50.1  | 51.0        | 51.3      | 51.1       | 47.6        |
| #2    | 49.5 | 51.9  | 50.6        | 51.1      | 46.7       | 44.7        |
| #3    | 54.6 | 55.3  | 54.1        | 53.0      | 51.8       | 48.5        |
| #4    | 37.5 | 37.8  | 38.6        | 38.1      | 38.3       | 35.4        |
| #5    | 50.1 | 50.8  | 51.9        | 50.7      | 47.2       | 45.0        |
| #6    | 59.4 | 58.4  | 59.3        | 58.9      | 59.4       | 55.7        |
| #7    | 44.9 | 44.6  | 44.3        | 44.5      | 43.2       | 41.3        |
| #8    | 46.3 | 46.4  | 45.8        | 44.8      | 45.6       | 43.8        |

**Table S6.** Modulation of CD4<sup>+</sup> subpopulation percentage vs SCTRL in PBMC of donors, following atrazine treatment after 4-days culture, expressed as percentage (positive value = increase, negative value = decrease)

|                  | atrazine    |           |            |             |
|------------------|-------------|-----------|------------|-------------|
| Donor            | 0.1 $\mu$ M | 1 $\mu$ M | 10 $\mu$ M | 100 $\mu$ M |
| #1               | 2%          | 2%        | 2%         | -5%         |
| #2               | -3%         | -2%       | -10%       | -14%        |
| #3               | -2%         | -4%       | -6%        | -12%        |
| #4               | 2%          | 1%        | 1%         | -6%         |
| #5               | 2%          | 0%        | -7%        | -11%        |
| #6               | 1%          | 1%        | 2%         | -5%         |
| #7               | -1%         | 0%        | -3%        | -7%         |
| #8               | -1%         | -3%       | -2%        | -6%         |
| Mean percentage* | 0%          | -1%       | -3%        | -8%         |

\*p-value = not significant (0.1  $\mu$ M), not significant (1  $\mu$ M), not significant (10  $\mu$ M), 0.0007 (100  $\mu$ M)
